# Supplementary material
Source: publisher figshare collection journal article supplement (https://springernature.figshare.com/ndownloader/files/13697786)
Supplement: Supplementary file 1 [file 13697786]

Additional file

Table S1 Crop growing seasons, traditional units of measuring harvest and their equivalent in kg.

| Crop | Growing season | Traditional units | Kg |
| --- | --- | --- | --- |
| Maize | 3.5 months | Tin | 20 kg |
| Beans | 2.5-3 months | Tin | 20 kg |
| Coffee | 3-4 months | Sack | 70 kg |
| Groundnuts | 4 months | Tin/sack | 14/60 kg |
| Cassava | 1 year | Basket | 20 kg |
| Sweet potato | 3-4 months | Basket | 20 kg |
| Irish potato | 3-4 months | Basket | 20 kg |
| Bananas | 1.5 years | Bunch | 32 kg |
| Yams | 1 year | Basket | 25 kg |
| Tomatoes | 3 months | Plywood box | 50 kg |
| Cabbage | 3 months | Head | 1k g |
| Eggplant | 3 months | Sack | 100 kg |
| Green peppers | 3 months | Tin/Basket | 15 kg |
| Pineapple | 2 years | Head | 1k g |
| Passion fruit | 5 months | Basket | 15 kg |
